# Supplementary material for: A Composite Nanosystem as a Potential Tool for the Local Treatment of Glioblastoma: Chitosan-Coated Solid Lipid Nanoparticles Embedded in Electrospun Nanofibers
Source: MDPI journal article supplement (doi:10.3390/polym13091371), 2021-04-22
Supplement: s1 [file s1]

## SUPPLEMENTARY MATERIALS

### 1. Synthesis and Characterization of O-Carboxymethyl Chitosan

#### 1.1 Methods

O-carboxymethyl chitosan (O-CMCS) was prepared modifying the method described by [18,29]. The carboxymethylation was performed *via* stirring CS at low molecular weight (LCS, 5 g) in 100 ml of 20% NaOH (w/v) for 15 min. After that, monochloroacetic acid (15 g) was gradually added in the suspension and stirring was continued for 2.5 h at 40°C. The reaction was neutralized with HCl 37% in an ice bath and, subsequently, a solution of 70% methanol was added. The reaction mixture was washed with methanol and dried under reduced pressure for 5 h. Solvent evaporation was performed under reduced pressure by a Heidolph Laborota 4000 instrument (Heidolph Instruments GmbH & Co., Schwabach, Germany). Then, the sample was grounded with a blade mill (A10 IKA-Werke GmbH & Co., Staufen, Germany). Jasco ATR-IR-4100 was used to register the IR spectra applying the compound as powder.

#### 1.2 Results and Discussion

Figure S1 shows the overlapping of FT-IR spectra of CS at low molecular weight (LCS) and the derivate O-carboxymethyl chitosan (O-CMCS). LCS displays two broad bands at 3445 and 3360  $\text{cm}^{-1}$ , which are typical of  $\text{NH}_2$  and OH stretching, and at 2919  $\text{cm}^{-1}$  corresponding to CH stretching of methyl group. Two bands at 1655  $\text{cm}^{-1}$  and 1596  $\text{cm}^{-1}$  can be attributed to CO of NH-CO stretching and to NH bending, while at 1085 and 1030  $\text{cm}^{-1}$  COH stretching bands are shown. On the other part, OCHT spectrum shows two new strong bands at 1580 and 1412  $\text{cm}^{-1}$  attributable to symmetric and asymmetric stretching vibration of  $\text{COO}^-$  salt. Thus, the introduction of carboxymethyl group was confirmed, suggesting that the substitution occurred at C6 position of chitosan. Data displayed here are in agreement with literature [18].

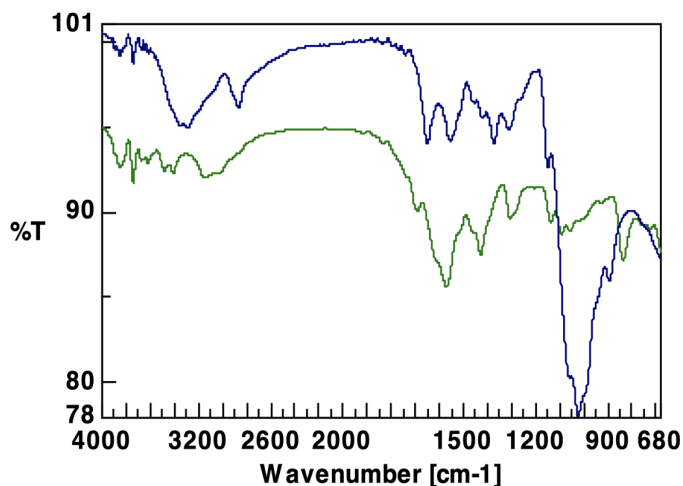

**Figure S1.** FTIR spectra of LCS (blue line) and its O-carboxymethyl derivative O-CMCS (green line).

### 2. Characterization of the Polymeric Solutions for Electrospinning

#### 2.1 Methods

All the polymeric solutions (OC1-OC5) and the mixture of c-SLN dispersion and OC3 (c-SLN/OC3) were characterized in terms of rheological properties and conductivity, as reported in [39,40].

##### 2.1.1 Rheological Measurements

Rheological analyses were carried out by means of a rotational rheometer (MCR 102, Anton Paar, Turin, Italy) equipped with a cone plate combination (CP50-1, diameter = 50 mm; angle = 1°) as measuring system.

Sample viscosity was investigated at increasing shear rates in the range 1–1000 s<sup>-1</sup> at 33°; three replicates were effected for each polymeric solution. Three replicates were considered for each polymeric solution.

### 2.1.2 Conductivity Measurements

Sample conductivity was measured with Mettler Toledo™ FiveGo™ F3 conductivity meter apparatus (Fisher Scientific, Milan, Italy). Three replicates were considered for each solution.

## 2.2 Results and Discussion

In Figure S2, the results of the rheological analyses performed on OC1-OC5 polymeric solutions are reported. As expected, the viscosity value at 1000 s<sup>-1</sup> increases on increasing O-CMCS concentration (Figure S2); such shear rate was selected since it simulated the stress to which the polymeric solutions were subjected during the electrospinning process.

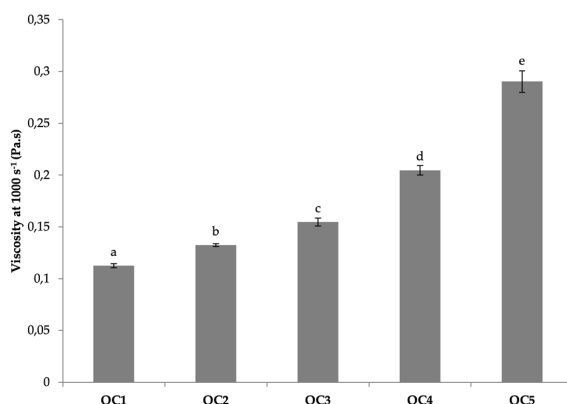

**Figure S2.** Viscosity values of OC1-OC5 polymeric solutions intended to be electrospun at 1000 s<sup>-1</sup>. Data are expressed as mean values  $\pm$  SD (n=3). ANOVA one-way; Sheffé Multiple Comparison ( $p < 0.05$ ): a vs b-e; b vs c-e; c vs d-e; d vs e.

The blending of the c-SLN dispersion with OC3 (c-SLN/OC3), which was selected as the most promising polymeric solution for the production of homogenous nanofibers by electrospinning, did not alter the rheological properties of OC3; as shown in Figure S3, the flow profile of OC3 is comparable to that of c-SLN/OC3.

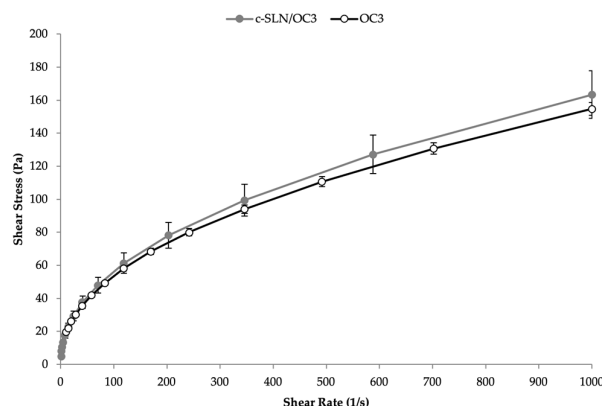

**Figure S3.** Flow profiles of OC3 and c-SLN/OC3 at increasing shear rates (1-1000 s<sup>-1</sup>). Data are expressed as mean values  $\pm$  SD (n=3).

Noteworthy, c-SLN/OC3 was characterized by a conductivity value significantly higher than that of OC3 ( $2224.33 \pm 54.24 \mu\text{S/cm}$  vs  $1661.56 \pm 37.89 \mu\text{S/cm}$ ; mean value  $\pm$  SD, n=3), probably due to the presence of c-SLN, whose surface was positively charged.
